1

**Type: Article (Discoveries)**

2

3

**A test statistic to quantify treelikeness in phylogenetics**

4

Caitlin Cherryh<sup>1,\*</sup>, Bui Quang Minh<sup>1,2</sup>, Rob Lanfear<sup>1</sup>

5

<sup>1</sup> Division of Ecology and Evolution, Research School of Biology, Australian National University,

6

Canberra, Australian Capital Territory, Australia

7

<sup>2</sup> Research School of Computer Science, Australian National University, Canberra, Australian Capital

8

Territory, Australia

9

**\*Author for Correspondence:** email: [caitlin.cherryh@anu.edu.au](mailto:caitlin.cherryh@anu.edu.au)

10

**Key words:** phylogenetic inference, model violation, systematic bias

## 11 **Abstract**

12 Most phylogenetic analyses assume that the evolutionary history of an alignment (either  
13 that of a single locus, or of multiple concatenated loci) can be described by a single  
14 bifurcating tree, the so-called the treelikeness assumption. Treelikeness can be violated by  
15 biological events such as recombination, introgression, or incomplete lineage sorting, and  
16 by systematic errors in phylogenetic analyses. The incorrect assumption of treelikeness may  
17 then mislead phylogenetic inferences. To quantify and test for treelikeness in alignments,  
18 we develop a test statistic which we call the tree proportion. This statistic quantifies the  
19 proportion of the edge weights in a phylogenetic network that are represented in a  
20 bifurcating phylogenetic tree of the same alignment. We extend this statistic to a statistical  
21 test of treelikeness using a parametric bootstrap. We use extensive simulations to compare  
22 tree proportion to a range of related approaches. We show that tree proportion successfully  
23 identifies non-treelikeness in a wide range of simulation scenarios, and discuss its strengths  
24 and weaknesses compared to other approaches. The power of the tree-proportion test to  
25 reject non-treelike alignments can be lower than some other approaches, but these  
26 approaches tend to be limited in their scope and/or the ease with which they can be  
27 interpreted. Our recommendation is to test treelikeness of sequence alignments with both  
28 tree proportion and mosaic methods such as 3Seq. The scripts necessary to replicate this  
29 study are available at <https://github.com/caitlinch/treelikeness>

30

## 31 **Introduction**

32 A phylogenetic tree is a representation of the relationships between species or individuals.  
33 Many estimates of phylogenetic trees implicitly assume that sites in a sequence alignment  
34 share the same evolutionary history and conform to a single bifurcating tree. This  
35 assumption is called treelikeness. This concept was first introduced by Dress (1984) and was  
36 first used to assess how well data fit a tree by Eigen *et al.* (1988). Perfectly treelike  
37 alignments are likely to be rare not only due to noise such as sequencing or alignment error  
38 but also because biological processes like incomplete lineage sorting (ILS), recombination, or  
39 introgression mean even very short alignments may have an evolutionary history that  
40 cannot be represented by a single bifurcating phylogeny (Mallet *et al.* 2016; Mendes *et al.*  
41 2019; Scornavacca and Galtier 2017). Although the treelikeness assumption is almost

42 universally made in phylogenetic analyses, it remains rare to test the validity of this  
43 assumption. If treelikeness is incorrectly assumed, phylogenetic inferences may be misled  
44 (Brown and Thomson 2018), so it is important to test whether the treelikeness assumption  
45 holds prior to estimating a phylogenetic tree. Doing so may assist phylogeneticists in  
46 choosing the best combination of data and inference method with which to infer their  
47 phylogeny.

48

49 Most estimates of phylogenetic trees assume that the data are treelike at some level.  
50 Concatenation methods (also known as supermatrix methods) assume that all loci in an  
51 alignment share a single evolutionary history. This approach has been criticised as the  
52 histories of individual loci may vary dramatically, potentially resulting in incorrect  
53 phylogenetic inferences (Shi and Yang 2018; Weisrock *et al.* 2012; Wielstra *et al.* 2014; Wu  
54 *et al.* 2018; Zhao *et al.* 2016). Concatenating alignments from loci with different  
55 evolutionary histories clearly violates the treelikeness assumption. Coalescent methods  
56 improve on the concatenation method by explicitly incorporating non-treelikeness due to  
57 ILS. To do so, coalescent methods allow each locus to have a separate tree topology and use  
58 the distribution of these topologies to then infer the species tree under a model of ILS.  
59 However, these methods still assume that the alignment used to produce each single-locus  
60 tree is treelike. Recent work shows that different exons in the same gene often have  
61 different evolutionary histories, meaning that in many cases the alignments used to  
62 estimate single-locus trees may not be treelike (Mendes *et al.* 2019; Scornavacca and Galtier  
63 2017). As a result, both concatenation and coalescent tree estimation methods may be  
64 vulnerable to errors introduced by violation of the treelikeness assumption.

65

66 Previous studies have proposed a range of approaches to measuring certain aspects of non-  
67 treelikeness. Goldman (1993) developed the first general test for model adequacy in  
68 evolutionary models, which simultaneously assess all assumptions of the evolutionary  
69 model, including the treelikeness assumption. Unfortunately, as all parameters of the model  
70 are tested simultaneously, the treelikeness of the alignment cannot be extracted from the  
71 results of this test. Additionally, several methods for visualizing treelikeness have been  
72 suggested. Likelihood mapping (Strimmer and von Haeseler 1997) is primarily used to  
73 visualise and estimate the phylogenetic signal of an alignment (Baric *et al.* 2003; Salzburger

74 *et al.* 2002; Steiner and Dreyer 2003) but has also been used to assess whether an alignment  
75 had a treelike structure (Nadan *et al.* 2003). The  $\delta$  plot method (Holland *et al.* 2002) allows  
76 assessment of the treelikeness of an alignment using a mathematical approach based on  
77 assessing the treelikeness of all possible quartets of taxa in the alignment. The mean  $\delta_q$   
78 value from the  $\delta$  plot method has been used to draw inferences about the overall  
79 treelikeness of an alignment, although the interpretation of this value varies: values of 0.11  
80 (Kozak *et al.* 2015) and 0.28 (Short *et al.* 2014) have been suggested to indicate significant  
81 non-bifurcating signal, and a value of 0.18 was suggested to indicate that an alignment was  
82 treelike (Grimm and Renner 2013).

83

84 Phylogenetic split networks have also been used to visualise the treelikeness of an  
85 alignment. A split network generalises a phylogenetic tree by representing incompatible  
86 phylogenetic signals present in the sequence alignment as additional edges (Huson *et al.*  
87 2010). Compared to a tree, a phylogenetic split network includes more information about  
88 the relationships between taxa as it includes conflicting phylogenetic signals and alternate  
89 histories (Bryant and Moulton 2004). The treelikeness of alignments can be visually  
90 determined based on the number, size and position of parallelograms within the network  
91 (Bryant and Moulton 2004; Kennedy *et al.* 2005; Kück *et al.* 2010). Phylogenetic networks  
92 provide a very useful visual tool for assessing treelikeness, but they can be somewhat  
93 difficult to interpret and there currently exists no framework for comparing the treelikeness  
94 of different alignments using networks. Ideally, a test statistic should quantify treelikeness  
95 in a way that is comparable across alignments and allow biologists to make informed  
96 decisions about which data and methods to use for inferring evolutionary histories.

97

98 Here, we introduce the tree proportion for quantifying the treelikeness of a multiple  
99 sequence alignment. The tree proportion of an alignment describes the proportion of a  
100 phylogenetic network of that alignment that can be represented by a single bifurcating tree.  
101 Specifically, it is the proportion of non-trivial split weights of an inferred network that are  
102 contained in a bifurcating phylogenetic tree of the same alignment. A split is trivial if one  
103 side of the bipartition contains only one taxon, i.e. terminal branches on a phylogeny  
104 represent trivial splits, because they are contained in all trees and networks and thus  
105 provide no information about treelikeness. Tree proportion ranges from 0 to 1, where a

106 score of 0 indicates that none of the non-trivial splits in the network are represented in the  
107 tree. A score of 1 indicates that all of the non-trivial splits in the network are represented in  
108 the tree (i.e. the alignment is perfectly treelike). More generally, the better that bifurcating  
109 phylogenetic tree represents an alignment, the closer the tree proportion will be to 1.

110

111 In addition to providing an intuitive measure of treelikeness, we describe how the tree  
112 proportion can be used to ask whether the assumption of treelikeness can be rejected for  
113 any given alignment. To do this, we use a parametric bootstrap to simulate treelike datasets  
114 with model parameters estimated from the original alignment, and then ask whether the  
115 observed tree proportion is surprisingly small relative to the tree proportions observed from  
116 the (truly treelike) simulated datasets. This allows us to generate a p-value for the test  
117 statistic, where a p-value < 0.05 indicates that the assumption of treelikeness can be  
118 rejected for the alignment in question. Finally, using introgression as a framework for  
119 simulating alignments of varying treelikeness, we demonstrate how the tree proportion can  
120 be used to quantify and test for treelikeness, and we compare its performance to previously  
121 suggested methods for estimating treelikeness, as well as certain measures that have been  
122 suggested specifically for testing introgression.

123

## 124 **New approaches**

### 125 Tree proportion

126 Tree proportion is defined as follows. For a split network denoted by  $(S, \lambda)$  where  $S$  is the  
127 set of non-trivial splits and  $\lambda$  is a split weight function, and a phylogenetic tree  $(T)$  the tree  
128 proportion is calculated as:

$$129 \quad \text{Tree proportion} = \frac{\sum_{\sigma \in S \cap T} \lambda(\sigma)}{\sum_{\sigma \in S} \lambda(\sigma)} \quad (1)$$

130 In other words, tree proportion is the proportion of the total weight of non-trivial splits in  
131 the network that are represented by the tree. Figure 1 illustrates how to calculate the tree  
132 proportion for a simple five-taxon split network and tree.

133

134 Calculating tree proportion requires both a bifurcating phylogenetic tree and a phylogenetic  
135 split network estimated from the same alignment. In principle the split network and the

136 bifurcating phylogenetic tree could be inferred with any method. Indeed, the maximum tree  
137 proportion for any given split network can be calculated simply from using the maximum  
138 spanning tree of the network as the bifurcating tree. In this study, we used Maximum  
139 Likelihood to estimate bifurcating trees for two reasons: (1) Maximum Likelihood is one of  
140 the most commonly used methods for tree inference, and (2) Maximum Likelihood naturally  
141 allows us to extend our approach to include a parametric bootstrap test because it co-  
142 estimates the bifurcating tree and the parameters of a model of molecular evolution. We  
143 used NeighborNet (Bryant and Moulton 2004) to estimate the split network. NeighborNet is  
144 a distance based agglomerative method for generating replicable and statistically consistent  
145 split networks. NeighborNet measures conflict rather than evolutionary history, so the  
146 resulting network represents conflicting signals within the alignment.

147

148 To calculate the tree proportion of an alignment, we first estimated a NeighborNet network  
149 in SplitsTree v4.14.6 (Huson and Bryant 2006). Next, we estimated a maximum likelihood  
150 tree for the same alignment using IQ-Tree v2.0 with ModelFinder (Kalyaanamoorthy *et al.*  
151 2017; Minh *et al.* 2020). Finally, we calculated tree proportion in R using code available from  
152 <https://github.com/caitlinch/treelikeness>.

153

## 154 Parametric bootstrap

155 Because we do not assume any prior distribution of tree proportion, we rely on a parametric  
156 bootstrap procedure to determine whether the tree proportion is significantly lower than  
157 would be expected for truly treelike alignments as follows. For a given alignment  $D$ , we  
158 reconstruct a maximum likelihood tree  $T_{ML}$  with the best-fit substitution model  $M$ . From  
159  $T_{ML}$  and  $M$  we simulate  $n$  ( $n=199$  by default) alignments  $D_1, \dots, D_n$ . From each  $D_i$  we  
160 reconstruct a maximum likelihood tree  $T_i$  and a NeighborNet network  $S_i$  and use  $T_i$  and  $S_i$   
161 to calculate the tree proportion  $TP_i$ . We calculate the statistics  $TP_1, \dots, TP_n$ . The p-value is  
162 then computed as the fraction of  $TP_i$  greater than or equal to  $TP$  of the original alignment.

163

## 164 Results

165 Decreased treelikeness due to increasing proportions of introgressed DNA

166 Of the six test statistics for treelikeness we compared, tree proportion ( $R^2 = 0.863$ ) and  
167 mean  $\delta_q$  ( $R^2 = 0.818$ ) showed the strongest correlations with the proportion of introgressed  
168 DNA (Figure 2). Both tree proportion and mean  $\delta_q$  were strongly correlated with the  
169 proportion of introgressed DNA whether the simulated introgression was reciprocal or non-  
170 reciprocal (Supplementary Figure 1: Tree proportion  $R^2 = 0.863$  and  $0.704$ ; mean  $\delta_q$   $R^2 =$   
171  $0.818$  and  $0.902$ ). Tree proportion was strongly correlated with the proportion of  
172 introgressed DNA regardless of the simulated tree depth (Supplementary Figure 2, all  $R^2 >$   
173  $0.692$ ). Mean  $\delta_q$  showed strong correlations on tree depths up to  $0.5$  (Supplementary Figure  
174  $2$ , all  $R^2 > 0.705$ ) but a much weaker correlation when the simulated tree depth was  $1.0$   
175 (Supplementary Figure 2,  $R^2 = 0.344$ ). The strength of the correlations between the  
176 proportion of introgressed DNA and the other four test statistics was highly variable and  
177 never higher than  $0.511$  under any simulation conditions (Figure 2, Supplementary Figures 1  
178 and 2).

179

180 The ability of each test to statistically reject treelikeness under simulated introgression  
181 events varied greatly (Figure 3). PHI and 3SEQ had the highest power to reject non-treelike  
182 alignments, and the tests successfully detect 100% of introgression events after the  
183 proportion of introgressed DNA reached  $0.2$  and  $0.1$  respectively (Figure 3). Mean  $\delta_q$  and  
184 tree proportion have intermediate results. At a proportion of introgressed DNA of  $0.5$ , these  
185 tests detect 98% and 99% respectively of the alignments containing introgression (Figure 3).  
186 Proportion of resolved quartets and mode  $\delta_q$  failed as statistical tests and did not  
187 successfully detect introgression events for any tree depth or event type (Figure 3,  
188 Supplementary Figures 3 and 4). Test results were very similar regardless of whether  
189 introgression was simulated as a reciprocal or a non-reciprocal event (Supplementary Figure  
190 3). All test statistics except proportion of resolved quartets and mode  $\delta_q$  have acceptable  
191 false positive rates (i.e., a significant result in approximately 5% of tests when there is no  
192 introgression in the simulation, shown as 0 on the x-axis of each panel in Figure 3). Both  
193 3SEQ and PHI have less power to detect introgression at lower tree depths. For a tree depth  
194 of  $0.05$  substitutions per site and at a proportion of introgressed DNA of  $0.5$ , PHI and 3SEQ  
195 correctly identify 96% and 95% of introgression events respectively (Supplementary Figure  
196 4). Conversely, tree proportion has less power to detect introgression at higher tree depths.  
197 For a tree depth of  $1$  substitution per site at a proportion of introgressed DNA of  $0.5$ , tree

198 proportion correctly identifies just over a third (35%) of introgression events  
199 (Supplementary Figure 4).

200

## 201 Decreased treelikeness due to increasing number of introgression events

202 Of the six test statistics we compared, only 3SEQ and tree proportion revealed clear  
203 decreases in treelikeness as the number of introgression events increased (Figure 4).

204 Encouragingly, tree proportion responded similarly for all tree depths and whether or not

205 the simulated recombination was reciprocal or non-reciprocal (Supplementary Figures 5 and

206 6). 3SEQ test statistic values were similar across reciprocal and non-reciprocal

207 recombination events (Supplementary Figure 5), but the range of values is dependent on

208 tree depth (Supplementary Figure 6). The PHI test statistic only identified nonreciprocal

209 introgression events (Supplementary Figure 5), and was more strongly correlated to the

210 number of introgression events at higher tree depths (Supplementary Figure 6). The

211 proportion of resolved quartets, mean  $\delta_q$  and mode  $\delta_q$  test statistic values showed at best

212 weak correlations with the number of introgression events, regardless of the simulation

213 conditions (Figure 4; Supplementary Figures 5 and 6).

214

215 Three test statistics performed well as statistical tests to reject treelikeness in the presence

216 of multiple introgression events (Figure 5). 3SEQ, tree proportion and PHI had the highest

217 power to reject non-treelike alignments, as the tests successfully detected 100% of

218 alignments containing introgression after 1, 2, and 3 events respectively (Figure 5). These

219 results were similar for nonreciprocal and reciprocal events (Supplementary Figure 7). The

220 best performing test statistic was tree proportion, which behaved similarly for all event

221 types and tree depths (Supplementary Figures 7 and 8). 3SEQ performed well at tree depth

222 of 0.5 substitutions per site (Figure 5) but showed very poor performance at the lowest tree

223 depth of 0.05 substitutions per site (Supplementary Figure 8). PHI also performed well at

224 tree depth of 0.5 substitutions per site (Figure 5), but its performance dropped below that

225 of tree proportion at low tree depths (Supplementary Figure 8). The other three statistics

226 (proportion of resolved quartets, mean  $\delta_q$  and mode  $\delta_q$ ) were unable to reject treelikeness

227 for the simulated introgressed alignments at any tree depth or event type (Figure 5,

228 Supplementary Figures 7 and 8). Only PHI and tree proportion had acceptable false positive



229 rates (i.e., a significant result in approximately 5% of tests when there is no introgression in  
230 the simulation, shown as 0 on the x-axis of each panel in Figure 5).

231

## 232 **Discussion**

233 In this study, we introduce the tree proportion as a way of measuring treelikeness, and  
234 testing (with a parametric bootstrap) whether a single bifurcating phylogenetic tree is  
235 sufficient to explain the evolutionary history of an alignment. Importantly for a proposed  
236 measure of treelikeness, tree proportion values are easy to interpret: a value of 1  
237 corresponds to a perfectly tree-like alignment (i.e. one whose evolutionary history can be  
238 perfectly explained by a single bifurcating phylogenetic tree), and as treelikeness reduces  
239 the tree proportion will decrease towards zero. These properties mean that the tree  
240 proportion can be used to directly compare the treelikeness of different alignments.

241

242 We use a suite of simulations to compare the tree proportion to five other tests, both as a  
243 measure of treelikeness and as a statistical test that can be used to reject treelikeness for a  
244 given alignment. Our results show that the tree proportion is a very useful measure of  
245 treelikeness: under a huge range of simulation conditions tree proportion consistently  
246 declines in concert with declines in the treelikeness of the alignment. When used as a  
247 statistical test to ask whether an alignment can reject treelikeness, the six test statistics we  
248 compare have varied success at detecting multiple causes of decreased treelikeness, and no  
249 one test performed the best across all simulation conditions. Tree proportion, 3SEQ (Lam *et al.*  
250 *al.* 2018) and PHI (Bruen *et al.* 2006) performed well as statistical tests rejecting treelikeness  
251 under simulated introgression events, and we found that at least one of these tests  
252 detected almost every simulated recombinant alignment in the majority of cases. It is  
253 perhaps unsurprising that PHI and 3SEQ performed well: both tests are designed to detect  
254 recombinant sequences of exactly the type we simulated. However, introgression is just one  
255 example of a biological event that reduces the treelikeness of an alignment, and our  
256 simulations show that both PHI and 3SEQ performed poorly in certain simulation conditions.  
257 As a result, we suggest that statistical tests of treelikeness for empirical alignments would  
258 be best served by combining a phylogenetic approach such as tree proportion with a  
259 mosaic-based test such as 3SEQ. The tree proportion test works in a wide variety of

260 conditions, and produces an easy-to-interpret test statistic. However, in many conditions  
261 (such as if the non-treelikeness is caused by introgression and the tree depth is above a  
262 certain threshold) 3SEQ has much more power to detect non-treelikeness. Using both tests  
263 therefore provides the most generality and power across all possible causes of non-  
264 treelikeness that may impact phylogenetic analyses.

265

266 Tree proportion joins a growing group of tests for absolute model adequacy. Penny *et al.*  
267 (1992) wrote that a fundamental criterion for a scientific method is that the data must be  
268 able to reject the model, a requirement that is rarely met in phylogenetics (Brown and  
269 Thomson 2018). Most phylogenetic analyses proceed with only relative tests of model  
270 adequacy (such as ModelFinder (Kalyaanamoorthy *et al.* 2017) which selects the best model  
271 from a pre-defined set of a models) or no test (Cui *et al.* 2013; de Souza *et al.* 2018; Grismer  
272 *et al.* 2018; Grybchuk *et al.* 2018; Kang *et al.* 2014; Lei and Dong 2016; Pearce *et al.* 2017;  
273 Tay *et al.* 2017). As model violation is widespread across phylogenetic datasets (Naser-  
274 Khmour *et al.* 2019), phylogenetic analyses may benefit if absolute tests for model adequacy  
275 are performed prior to tree estimation. Tree proportion builds on the absolute test for  
276 model accuracy developed by Goldman (1993). While Goldman's test encompasses all  
277 assumptions of the tree and model which are used to calculate the likelihood in  
278 phylogenetic analyses, the tree proportion assesses a subset of model assumptions, and  
279 asks specifically to what extent a single bifurcating tree is adequate for explaining the  
280 evolutionary history of a given alignment.

281

282 The PHI test has been widely used to detect recombination in phylogenetic alignments  
283 (Cabanne *et al.* 2008; Croll and Sanders 2009; Croucher *et al.* 2015; D'Horta *et al.* 2011;  
284 Faria *et al.* 2016; Harris *et al.* 2012; Joly and Bruneau 2006; Ogura *et al.* 2009; Pinho *et al.*  
285 2008; Tian *et al.* 2012; Weinert *et al.* 2009). The PHI test performed well in our simulations  
286 and detected almost all introgression events under all simulation conditions. Similarly,  
287 Bruen *et al.* (2006) and Haubold *et al.* (2013) found the PHI test accurately detected  
288 recombination in simulated coalescent data and in empirical datasets including bacteria,  
289 fungi and virus DNA, and animal mtDNA. However, the PHI test performs poorly when  
290 sequence diversity is low (less than 10%), when alignments are short and/or when the  
291 number of taxa is low (less than 10) (Bruen *et al.* 2006; White *et al.* 2013; White and

292 Gemmell 2009). In previous simulations where the power of the PHI test was low, the  
293 sequence diversity ranged from 0.01 to  $1.25 \times 10^{-3}$  (Bruen *et al.* 2006; White *et al.* 2013;  
294 White and Gemmell 2009). The diversity in our simulated alignments was much higher than  
295 this, and therefore our simulations contained sufficient informative sites and  
296 incompatibilities for the test to perform well. The PHI test is a powerful and accurate test  
297 for recombination when the sequence diversity and number of taxa are sufficiently large,  
298 and is conservative and results in false negatives when they are not.

299

300 Likelihood mapping and  $\delta$  plots allow visualisation of the phylogenetic content of a  
301 sequence alignment, but we show here that they do not perform well as test statistics for  
302 treelikeness. The mean  $\delta$  value has been used to quantify the treelikeness of an alignment,  
303 with values from 0 to 0.2 generally interpreted as highly treelike (Coiro and Barone Lumaga  
304 2018; Dashper *et al.* 2017; Grimm and Renner 2013; Kozak *et al.* 2015; Meier-Kolthoff and  
305 Göker 2019; Short *et al.* 2014; Stanborough *et al.* 2018). However, the mean  $\delta$  responds  
306 inconsistently to causes of decreased treelikeness, so a low mean  $\delta$  value does not  
307 necessarily indicate that an alignment is treelike (e.g., the mean  $\delta$  value was 0.048 for one  
308 of our simulations in which the alignment contained 8 introgression events). Similarly, the  
309 proportion of resolved quartets from likelihood mapping has been interpreted as an  
310 indicator of the treelikeness of an alignment, with values from 0.8 and up interpreted as  
311 treelike (Buesa *et al.* 2002; Elena *et al.* 2001; Li *et al.* 2017; Morgan *et al.* 2014; Nadan *et al.*  
312 2003; Pitra *et al.* 2002; Salemi *et al.* 2000; Shi *et al.* 2012; Verbruggen and Theriot 2008).  
313 Likelihood mapping displays the phylogenetic content of an alignment by plotting the  
314 treelikeness of individual quartets. However, our results show that this correlates very  
315 poorly with the overall treelikeness of an alignment (e.g., the proportion of resolved  
316 quartets was 1.0 for some of our simulations in which the alignment contained 8  
317 introgression events). The proportion of resolved quartets for our simulations is high – the  
318 minimum value was 70% (Supplementary Figure 2), but the majority of simulations had a  
319 proportion of resolved quartets above 85%, despite most of them containing significant  
320 non-treelikeness such as multiple introgression events involving a large fraction of the  
321 alignment. The reason that the proportion of resolved quartets remains high in these  
322 simulations is that each introgression event involves only a few taxa, meaning only a small

323 proportion of quartets are affected and the contribution to the proportion of resolved  
324 quartets is low. As a result of these limitations, we recommend using these methods for  
325 visual assessment of phylogenetic information, but not for quantifying or testing for  
326 treelikeness.

327

328 While the parametric bootstrap approach we propose here is designed to isolate non-  
329 treelikeness from other signals in the data, this separation will not always be perfect. A  
330 statistically significant result from the parametric bootstrap indicates a significant difference  
331 in test statistic values between the original alignment and the bootstrap replicates. In our  
332 simulations, the only difference between the original alignment and the bootstrap replicates  
333 was that the former included introgression events. The same will not be true for empirical  
334 alignments, as the models we use for empirical data are gross oversimplifications of the true  
335 underlying process (e.g. (Song *et al.* 2010) (Lemmon and Moriarty 2004)). As a result, the  
336 parametric bootstrap may return a significant result if other types of model violation lead to  
337 differences in the treelikeness between the empirical and the bootstrap-replicate  
338 alignment. Given that model violation is widespread and common within phylogenetic  
339 datasets (Naser-Khdour *et al.* 2019), we suggest that a significant result from the parametric  
340 bootstrap should be interpreted as likely, but not certain, to be caused by non-treelikeness  
341 in the empirical alignment. Regardless of the cause, a significant result from the parametric  
342 bootstrap should be cause for concern, and perhaps warrant further investigation of the  
343 offending alignment.

344

## 345 **Materials and Methods**

### 346 *Simulation approach*

347 Introgression is a potential source of non-treelikeness that is known to mislead phylogenetic  
348 inferences (Posada and Crandall 2002; Wiens 1998). However, it is hard to account for with  
349 current methods. Introgression provides a framework wherein different types and amounts  
350 of non-treelikeness can be simulated on a linear scale (Posada and Crandall 2002). In this  
351 study, we use introgression as a framework for simulating non-treelike alignments in order  
352 to compare new and existing measures and tests for treelikeness. Here, we compare tree  
353 proportion with two tests for introgression: the Pairwise Homoplasy Index (PHI) (Bruen *et*

354 *al.* 2006) and 3SEQ (Boni *et al.* 2007; Lam *et al.* 2018). We also applied two existing methods  
355 that have been used to test for treelikeness in previous studies:  $\delta$  plotting (Holland *et al.*  
356 2002) and likelihood mapping (Strimmer and von Haeseler 1997).

357

358 PHI measures the minimum number of convergent mutations on any tree to describe the  
359 genealogy of a pair of sites. PHI is a widely used test for recombination or introgression and  
360 was previously found to outperform other similar tests (Bruen *et al.* 2006). We calculated  
361 the PHI value and p-value for the each alignment using PhiPack (Bruen 2005).

362

363 The second test, 3SEQ, attempts to calculate the number and location of introgression  
364 events for a given alignment by testing each triplet of sequences using a hypergeometric  
365 random walk to determine if one sequence is the child of the other two (Boni *et al.* 2007;  
366 Lam *et al.* 2018). 3SEQ has been shown to perform well in simulations (Boni *et al.* 2007; Lam  
367 *et al.* 2018). We used the 3SEQ implementation (Lam *et al.* 2018) to calculate the number of  
368 recombinant triplets, number of recombinant sequences and p-value for each alignment.

369

370 We also applied both the  $\delta$  plotting (Holland *et al.* 2002) and likelihood mapping (Strimmer  
371 and von Haeseler 1997) methods, which have been previously used to estimate treelikeness  
372 of an alignment. To obtain a test statistic for the  $\delta$  plotting method, we applied the  
373 `delta.plot` function in the R package `ape` v5.4-1 (Paradis *et al.* 2004) to the distance matrix  
374 for each alignment and calculated the mean and mode  $\delta_q$  value. The mean or mode  $\delta_q$  will  
375 be between 0 and 1, where larger values are less tree-like. We used the likelihood mapping  
376 implementation in IQ-Tree (Minh *et al.* 2020) with the number of quartets to sample set to  
377 25 times the number of taxa, and took the test statistic to be the number of fully-resolved  
378 quartets. This test statistic is a proportion, with a value of 1 indicating that every quartet  
379 sampled was tree-like. The test statistic value decreases as the quartets become less tree-like.  
380 The p-values for both the  $\delta$  plotting and likelihood mapping methods were calculated using  
381 a parametric bootstrap.

382

383 Simulating multiple sequence alignments with introgression

384 To simulate alignments with introgression, we extended the two-tree simulation approach  
385 described in Posada and Crandall (2002) and shown in Figure 6. This method uses forward  
386 time phylogenetic simulations to simulate alignments which mimic those that would be  
387 produced by introgression events and allows for control over the placement and timing and  
388 of introgression events. In principle, one alignment can be simulated along a tree and then a  
389 portion of DNA from one species replaced by a portion of DNA from a second species. Here,  
390 we achieve the same results by simulating DNA along two trees and then concatenating the  
391 two sequences to mimic the result of introgression. This approach provides a simple and  
392 flexible framework for simulating introgression on multiple sequence alignments (Posada  
393 and Crandall 2002).

394

395 We used this framework to simulate datasets under two scenarios of varying treelikeness:  
396 increasing proportion of introgressed DNA and increasing number of introgression events.  
397 Firstly, we investigated the effect of increasing the proportion of introgressed DNA (i.e.  
398 proportion of final tree) by simulating sequence alignments on a balanced 8-taxon tree from  
399 0 – 50% introgressed DNA sequence in 1% intervals. 10 replicates were conducted for each  
400 set of simulation parameters. We applied the following test statistics to each alignment:  
401 tree proportion,  $\delta$  plots, likelihood mapping, PHI test and 3SEQ. Due to the high  
402 computational expense of the parametric bootstrap, our tree proportion test was calculated  
403 only for the proportion of introgressed DNA from 0% – 50% in 10% intervals (6 intervals  
404 total). Secondly, we investigated the effect of increasing the number of introgression events  
405 by simulating 0 to 8 introgression events on a 32-taxon balanced tree. A 32-taxon balanced  
406 tree has 8 balanced subtrees, each consisting of two clades with two species each. Each  
407 introgression event takes place within one subtree, allowing from 0 to 8 simultaneous  
408 events. For this set of simulations, we fixed the proportion of introgressed DNA at 50%. We  
409 performed 100 replicates of each set of simulation parameters. Five test statistics were  
410 applied to each alignment as above. The tree proportion test was only performed for the  
411 first ten replicates of each set of simulation parameters due to the high computational load.

412

413 Other simulation parameters were as follows. All simulations were repeated for reciprocal  
414 and non-reciprocal introgression events. A non-reciprocal event, in which DNA is  
415 introgressed unidirectionally from one lineage into another, is shown in Figure 6. In a

416 reciprocal event, there is a bidirectional exchange of genetic material between two species.  
417 For all simulations, we fixed the sequences length to 1300 base pairs (the average length of  
418 a transcript in eukaryotes, from Xu *et al.* (2006)), and the model of substitution to the Jukes-  
419 Cantor model (Jukes and Cantor 1969). We simulated four substitution rates (in  
420 substitutions per site), 0.05, 0.1, 0.5 and 1, to simulate varying rates of molecular evolution  
421 across simulations. The total number of simulated alignments was 4080 for the first set of  
422 simulations and 6800 for the second set.

423

424 The scripts for this analysis were written in R v3.6.3 (R Core Team 2020) using the packages  
425 ape v5.4-1 (Paradis *et al.* 2004), ggplot2 v3.3.2 (Wickham 2016), phangorn v2.5.5 (Schliep  
426 2011), phytools v0.7-20 (Revell 2012), seqinr v3.6.1 (Charif and Lobry 2007), stringr v1.4.0  
427 (Wickham 2019) and TreeSim v2.4 (Stadler 2017). Code to replicate all simulations is  
428 available from <https://github.com/caitlinch/treelikeness>. Results from the simulations  
429 containing test statistic and statistical test results for all six tests are available in the article  
430 and in its online supplementary material.

431

## 432 **Acknowledgements**

433 The authors would like to thank Barbara Holland, Lindell Bromham, David Gordon and Rod  
434 Peakall for their comments and advice. This work was supported by the Australian Research  
435 Council grant no. DP-200103151 to R.L. and B.Q.M.

436 **Figures**

437 Figure 1

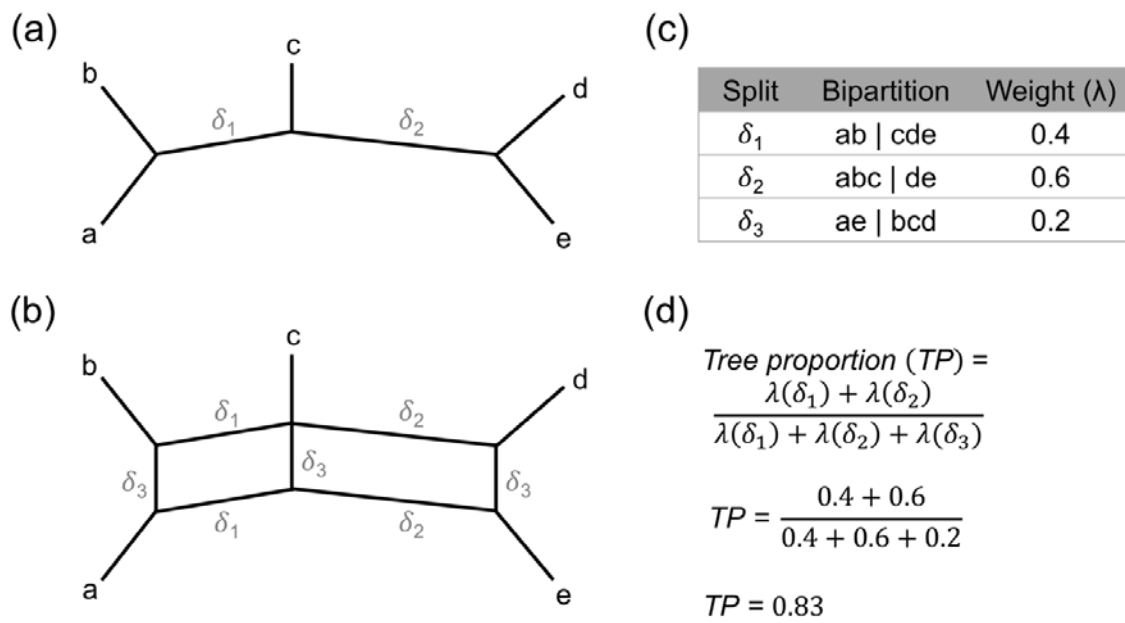

438

439



440 Figure 2

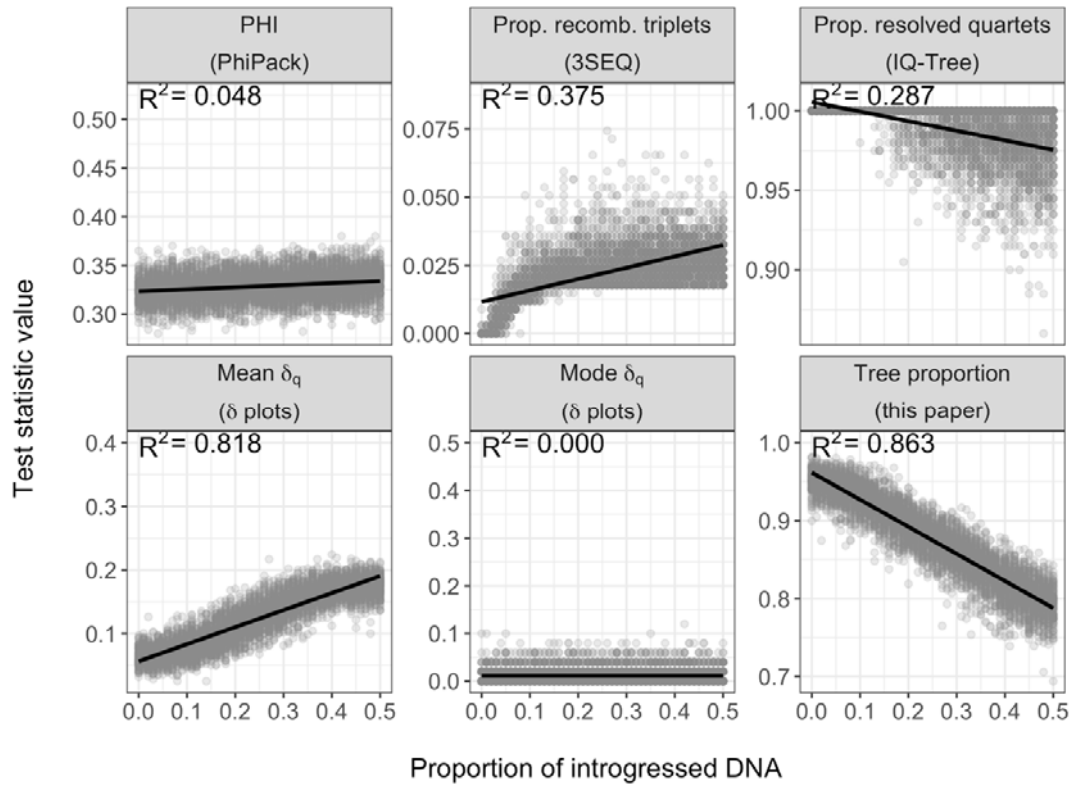

441  
442

443 Figure 3

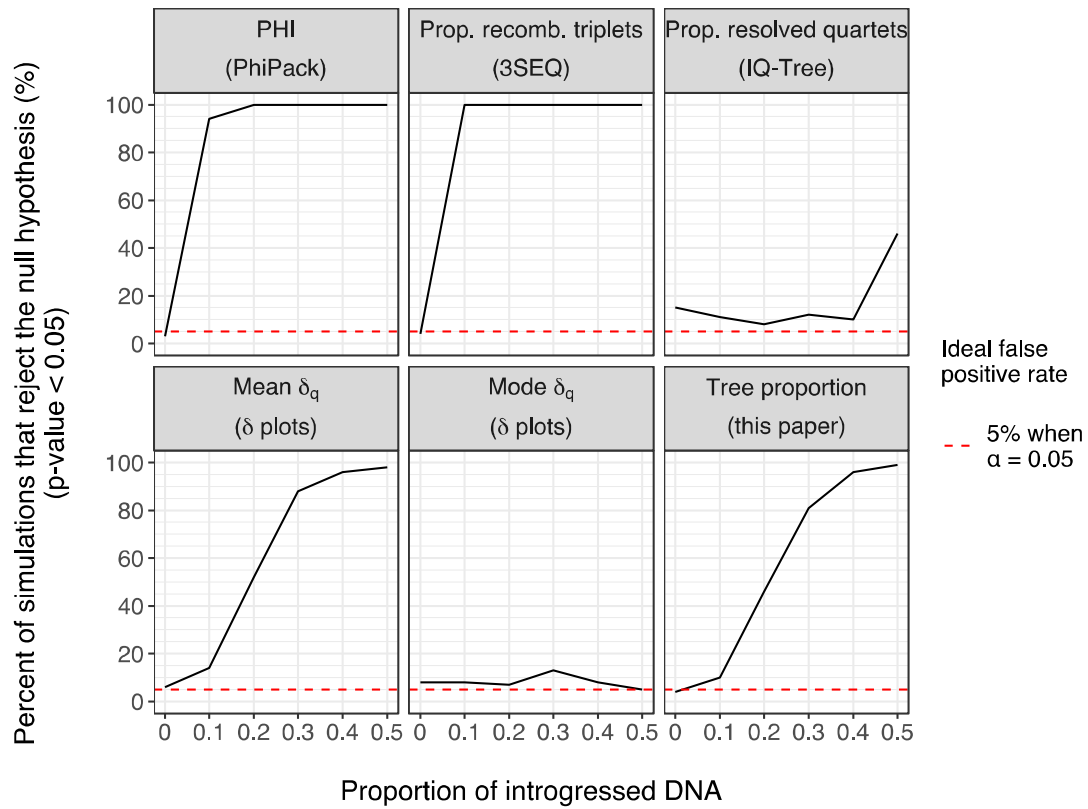

444

445

446 Figure 4

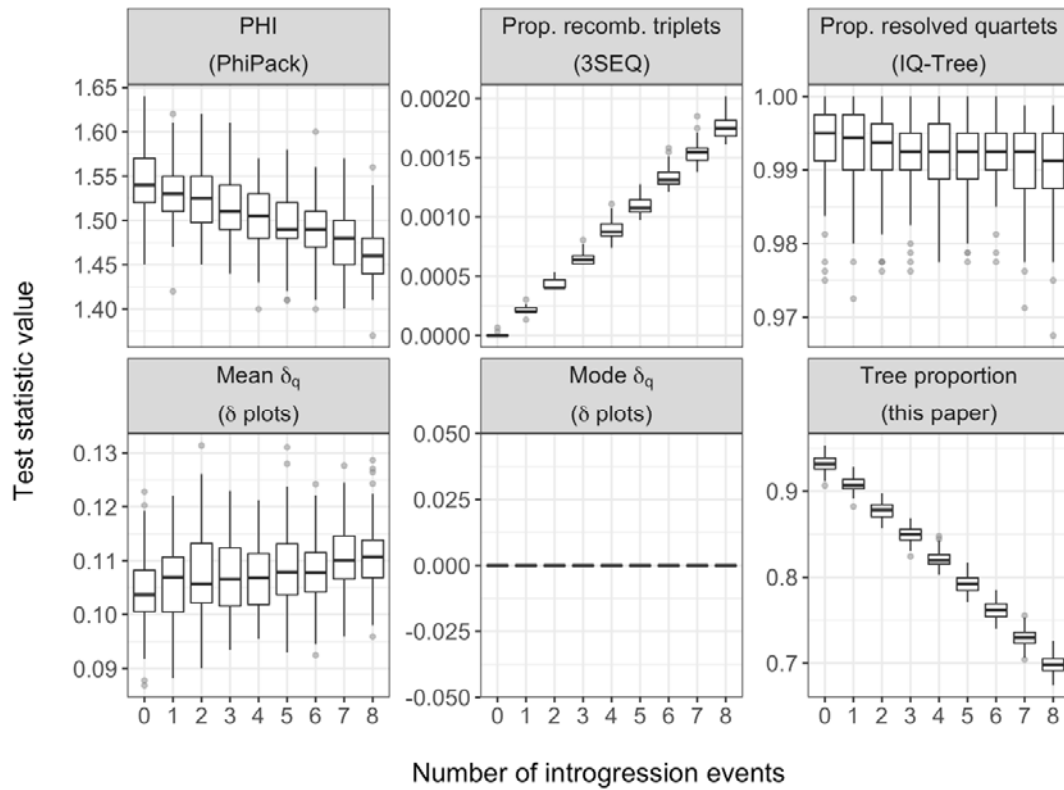

447  
448

449 Figure 5

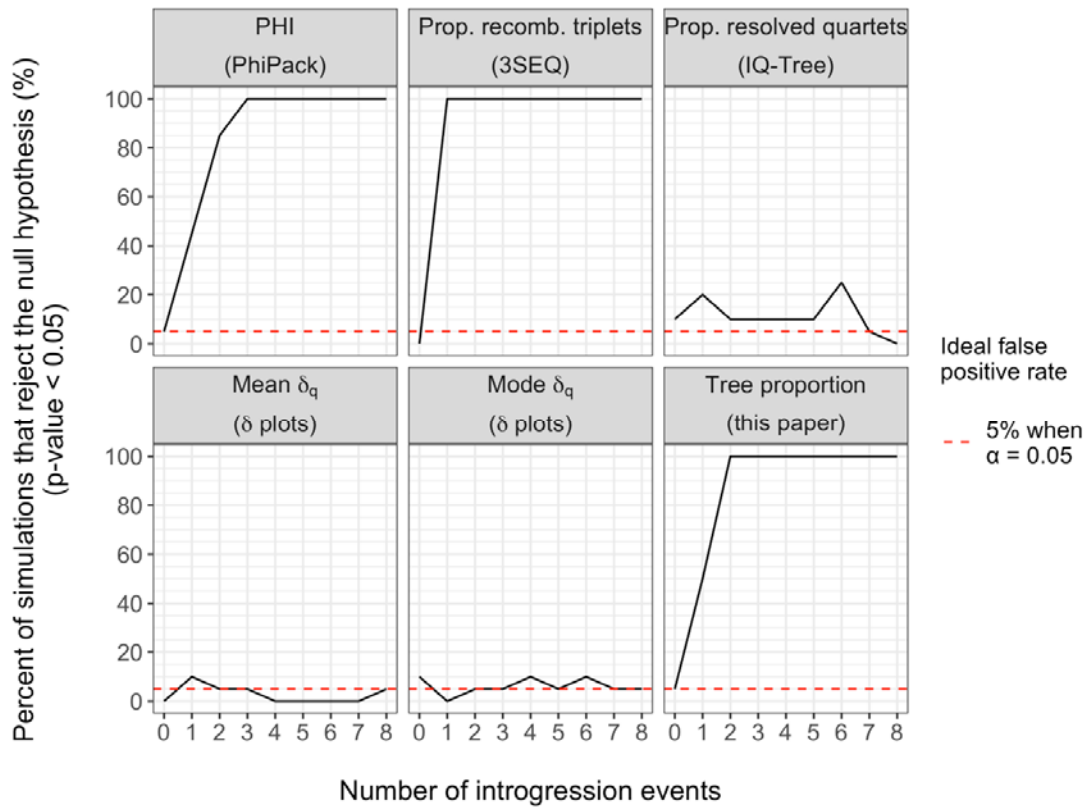

450  
451

452 Figure 6

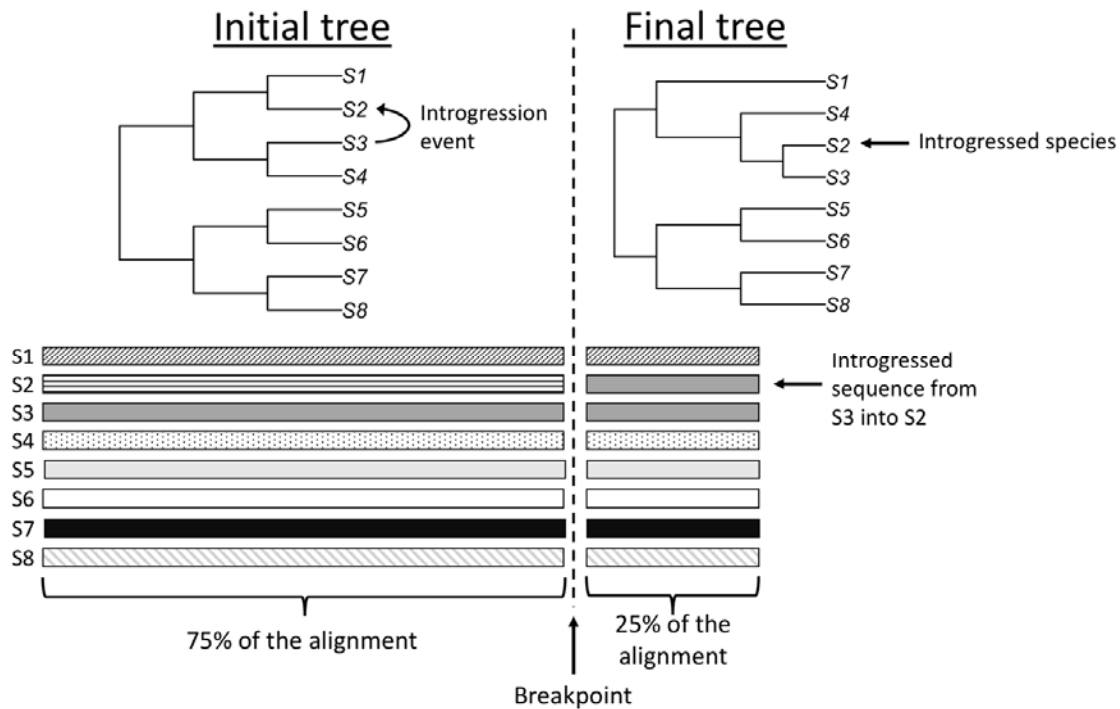

453

454

### 455 Figure Legends

456 **Figure 1. a.** a simple phylogenetic tree for five taxa. Non-trivial splits are labelled. **b.** A split  
457 phylogenetic network for the same five taxa. Non-trivial splits are labelled. **c.** Table showing  
458 the bipartition of taxa and weight for each non-trivial split. **d.** Sample calculation of the tree  
459 proportion for the alignment with tree **a** and network **b**.

460 **Figure 2:** Test statistic values for increasing proportions of introgressed DNA from 0 to 0.5 in  
461 0.01 increments with one close, non-reciprocal introgression events and tree depth of 0.5 ( $n$   
462 = 100). Each point represents the test statistic value for a single simulated alignment. Prop.  
463 recomb. triplets is the proportion of recombinant triples. Prop. resolved quartets is the  
464 proportion of resolved quartets.

465 **Figure 3:** Percentage of simulated alignments that reject the null hypothesis as the  
466 proportion of introgressed DNA increases for all six test statistics. Simulated alignments had  
467 a single close, non-reciprocal introgression event and tree depth was 0.5. Each line  
468 represents the number of alignments (out of 100 replicates) that reject the null hypothesis

469 of treelikeness. Prop. recomb. triplets is the proportion of recombinant triples. Prop.  
470 resolved quartets is the proportion of resolved quartets.

471 **Figure 4:** Test statistic values for number of non-reciprocal introgression events and tree  
472 depth of 0.5 ( $n = 100$ ). Each box shows the distribution of test statistic values at a certain  
473 number of introgression events. The whiskers extend to the closest observed value no more  
474 than 1.5 times the interquartile range away from the box. Points represent outliers. Prop.  
475 recomb. triplets is the proportion of recombinant triples. Prop. resolved quartets is the  
476 proportion of resolved quartets.

477 **Figure 5:** Percentage of simulated alignments that reject the null hypothesis as the number  
478 of non-reciprocal introgression events increases for all six test statistics. Simulated  
479 alignments had a tree depth of 0.5. Each line represents the number of alignments (out of  
480 100 replicates) that reject the null hypothesis of treelikeness. The red dotted line represents  
481 the ideal false positive rate of 5% when  $\alpha = 0.05$ . Prop. recomb. triplets is the proportion of  
482 recombinant triples. Prop. resolved quartets is the proportion of resolved quartets.

483 **Figure 6:** Simulation of a mosaic multiple sequence alignment with an introgression event,  
484 adapted from Posada and Crandall (2002). The initial sequence ( $n\%$  of the final sequence,  
485 here  $n = 75\%$ ) is simulated along a balanced 8-taxon tree. The introgression event shown  
486 here consists of genetic material from S3 overwriting the original sequence in S2 (as shown  
487 by the arrows). In the final tree, the introgression event has occurred, moving the position  
488 of S2 in the phylogeny.  $25\% ((1 - n) \%)$  of the alignment is then simulated along this tree.  
489 Two trees are needed to explain the evolutionary history of this alignment, violating the  
490 treelikeness assumption.

## 491 **References**

- 492 Baric S, Salzburger W, Sturmbauer C. 2003. Phylogeography and evolution of the  
493 Tanganyikan Cichlid genus *Tropheus* based upon mitochondrial DNA Sequences. *J.*  
494 *Mol. Evol.* 56(1):54-68.
- 495 Boni MF, Posada D, Feldman MW. 2007. An exact nonparametric method for inferring  
496 mosaic structure in sequence triplets. *Genetics* 176(2):1035-1047.
- 497 Brown JM, Thomson RC. 2018. Evaluating model performance in evolutionary biology. *Annu.*  
498 *Rev. Ecol. Evol. Syst.* 49(1):95-114.
- 499 Bruen T. 2005. PhiPack. Online, available at  
500 <https://www.maths.otago.ac.nz/~dbryant/software.html>.

- 501 Bruen TC, Philippe H, Bryant D. 2006. A simple and robust statistical test for detecting the  
502 presence of recombination. *Genetics* 172(4):2665.
- 503 Bryant D, Moulton V. 2004. Neighbor-Net: an agglomerative method for the construction of  
504 phylogenetic networks. *Mol. Bio. Evol.* 21(2):255-265.
- 505 Buesa J, Collado B, López-Andújar P, Abu-Mallouh R, Rodríguez Díaz J, García Díaz A, Prat J,  
506 Guix S, Llovet T, Prats G et al. . 2002. Molecular epidemiology of caliciviruses causing  
507 outbreaks and sporadic cases of acute gastroenteritis in Spain. *J. Clin. Microbiol.*  
508 40(8):2854-2859.
- 509 Cabanne GS, d'Horta FM, Sari EHR, Santos FR, Miyaki CY. 2008. Nuclear and mitochondrial  
510 phylogeography of the Atlantic forest endemic *Xiphorhynchus fuscus* (Aves:  
511 Dendrocolaptidae): biogeography and systematics implications. *Mol. Phylogenet.*  
512 *Evol.* 49(3):760-773.
- 513 Charif D, Lobry JR. 2007. SeqinR 1.0-2: a contributed package to the R project for statistical  
514 computing devoted to biological sequences retrieval and analysis. In: Bastolla U,  
515 Porto M, Roman HE, Vendruscolo M, editors. Structural approaches to sequence  
516 evolution: Molecules, networks, populations. New York: Springer Verlag. p. 207-232.
- 517 Coiro M, Barone Lumaga MR. 2018. Disentangling historical signal and pollinator selection  
518 on the micromorphology of flowers: an example from the floral epidermis of the  
519 Nymphaeaceae. *Plant Biol.* 20(5):902-915.
- 520 Croll D, Sanders IR. 2009. Recombination in *Glomus intraradices*, a supposed ancient asexual  
521 arbuscular mycorrhizal fungus. *BMC Evol. Biol.* 9(1):13.
- 522 Croucher NJ, Page AJ, Connor TR, Delaney AJ, Keane JA, Bentley SD, Parkhill J, Harris SR.  
523 2015. Rapid phylogenetic analysis of large samples of recombinant bacterial whole  
524 genome sequences using Gubbins. *Nucleic Acids Res.* 43(3):e15.
- 525 Cui R, Schumer M, Kruesi K, Walter R, Andolfatto P, Rosenthal GG. 2013. Phylogenomics  
526 reveals extensive reticulate evolution in *Xiphophorus* fishes. *Evolution* 67(8):2166-  
527 2179.
- 528 D'Horta FM, Cabanne GS, Meyer D, Miyaki CY. 2011. The genetic effects of Late Quaternary  
529 climatic changes over a tropical latitudinal gradient: diversification of an Atlantic  
530 Forest passerine. *Mol. Ecol.* 20(9):1923-1935.
- 531 Dashper SG, Mitchell HL, Seers CA, Gladman SL, Seemann T, Bulach DM, Chandry PS, Cross  
532 KJ, Cleal SM, Reynolds EC. 2017. *Porphyromonas gingivalis* uses specific domain  
533 rearrangements and allelic exchange to generate diversity in surface virulence  
534 factors. *Front. Microbiol.* 8:48.
- 535 de Souza WM, Fumagalli MJ, de Araujo J, Sabino-Santos G, Maia FGM, Romeiro MF, Modha  
536 S, Nardi MS, Queiroz LH, Durigon EL et al. . 2018. Discovery of novel anelloviruses in  
537 small mammals expands the host range and diversity of the *Anelloviridae*. *Virology*  
538 514:9-17.
- 539 Dress AWM. 1984. Trees, tight extensions of metric spaces, and the cohomological  
540 dimension of certain groups: a note on combinatorial properties of metric spaces  
541 *Adv. Math.* 53:321-402.
- 542 Eigen M, Winkler-Oswatitsch R, Dress A. 1988. Statistical geometry in sequence space: a  
543 method of quantitative comparative sequence analysis. *Proc. Natl. Acad. Sci. U.S.A.*  
544 85(16):5913.
- 545 Elena SF, Dopazo J, de la Peña M, Flores R, Diener TO, Moya A. 2001. Phylogenetic analysis  
546 of viroid and viroid-like satellite RNAs from plants: a reassessment. *J. Mol. Evol.*  
547 53(2):155-159.

- 548 Faria NR, Azevedo RdSdS, Kraemer MUG, Souza R, Cunha MS, Hill SC, Thézé J, Bonsall MB,  
549 Bowden TA, Rissanen I et al. . 2016. Zika virus in the Americas: early epidemiological  
550 and genetic findings. *Science* 352(6283):345-349.
- 551 Goldman N. 1993. Statistical tests of models of DNA substitution. *J. Mol. Evol.* 36(2):182-  
552 198.
- 553 Grimm GW, Renner SS. 2013. Harvesting Betulaceae sequences from GenBank to generate a  
554 new chronogram for the family. *Bot. J. Linn. Soc.* 172(4):465-477.
- 555 Grismer LL, Wood JRPL, Quah ESH, Anuar S, Ngadi EB, Izam NAM, Ahmad N. 2018.  
556 Systematics, ecomorphology, cryptic speciation and biogeography of the lizard genus  
557 *Tytthoscincus* Linkem, Diesmos & Brown (Squamata: Scincidae) from the sky-island  
558 archipelago of Peninsular Malaysia. *Zool. J. Linn. Soc.* 183(3):635-671.
- 559 Grybchuk D, Akopyants NS, Kostygov AY, Konovalovas A, Lye L-F, Dobson DE, Zangger H,  
560 Fasel N, Butenko A, Frolov AO et al. . 2018. Viral discovery and diversity in  
561 trypanosomatid protozoa with a focus on relatives of the human parasite  
562 *Leishmania*. *Proc. Natl. Acad. Sci. U.S.A.* 115(3):E506.
- 563 Harris SR, Clarke IN, Seth-Smith HMB, Solomon AW, Cutcliffe LT, Marsh P, Skilton RJ, Holland  
564 MJ, Mabey D, Peeling RW et al. . 2012. Whole-genome analysis of diverse *Chlamydia*  
565 *trachomatis* strains identifies phylogenetic relationships masked by current clinical  
566 typing. *Nat. Genet.* 44:413.
- 567 Haubold B, Krause L, Horn T, Pfaffelhuber P. 2013. An alignment-free test for recombination.  
568 *Bioinformatics* 29(24):3121-3127.
- 569 Holland BR, Huber KT, Dress A, Moulton V. 2002.  $\delta$  plots: a tool for analyzing phylogenetic  
570 distance data. *Mol. Biol. Evol.* 19(12):2051-2059.
- 571 Huson DH, Bryant D. 2006. Application of phylogenetic networks in evolutionary studies.  
572 *Mol. Bio. Evol.* 23(2):254-267. Software available from [www.splitstree.org](http://www.splitstree.org).
- 573 Huson DH, Rupp R, Scornavacca C. 2010. Phylogenetic networks. Cambridge: Cambridge  
574 University Press.
- 575 Joly S, Bruneau A. 2006. Incorporating allelic variation for reconstructing the evolutionary  
576 history of organisms from multiple genes: an example from *Rosa* in North America.  
577 *Syst. Biol.* 55(4):623-636.
- 578 Jukes TH, Cantor CR. 1969. Evolution of protein molecules. In: Munro HN, editor.  
579 Mammalian Protein Metabolism. New York: Academic Press. p. 21-132.
- 580 Kalyaanamoorthy S, Minh BQ, Wong TKF, von Haeseler A, Jermiin LS. 2017. ModelFinder:  
581 fast model selection for accurate phylogenetic estimates. *Nat. Methods* 14(6):587-  
582 589.
- 583 Kang YJ, Kim SK, Kim MY, Lestari P, Kim KH, Ha B-K, Jun TH, Hwang WJ, Lee T, Lee J et al. .  
584 2014. Genome sequence of mungbean and insights into evolution within *Vigna*  
585 species. *Nat. Commun.* 5:5443.
- 586 Kennedy M, Holland BR, Gray RD, Spencer HG. 2005. Untangling long branches: identifying  
587 conflicting phylogenetic signals using spectral analysis, Neighbor-Net, and consensus  
588 networks. *Syst. Biol.* 54(4):620-633.
- 589 Kozak KM, Wahlberg N, Neild AFE, Dasmahapatra KK, Mallet J, Jiggins CD. 2015. Multilocus  
590 species trees show the recent adaptive radiation of the mimetic *Heliconius*  
591 butterflies. *Syst. Biol.* 64(3):505-524.
- 592 Kück P, Meusemann K, Dambach J, Thormann B, von Reumont BM, Wägele JW, Misof B.  
593 2010. Parametric and non-parametric masking of randomness in sequence  
594 alignments can be improved and leads to better resolved trees. *Front. Zool.* 7(1):10.



- 595 Lam HM, Ratmann O, Boni MF. 2018. Improved algorithmic complexity for the 3SEQ  
596 recombination detection algorithm. *Mol. Biol. Evol.* 35(1):247-251.
- 597 Lei M, Dong D. 2016. Phylogenomic analyses of bat subordinal relationships based on  
598 transcriptome data. *Sci. Rep.* 6:27726.
- 599 Lemmon AR, Moriarty EC. 2004. The importance of proper model assumption in Bayesian  
600 phylogenetics. *Syst. Biol.* 53(2):265-277.
- 601 Li X, Liu H, Liu L, Feng Y, Kalish ML, Ho SYW, Shao Y. 2017. Tracing the epidemic history of  
602 HIV-1 CRF01\_AE clusters using near-complete genome sequences. *Sci. Rep.*  
603 7(1):4024.
- 604 Mallet J, Besansky N, Hahn MW. 2016. How reticulated are species? *Bioessays* 38(2):140-  
605 149.
- 606 Meier-Kolthoff JP, Göker M. 2019. TYGS is an automated high-throughput platform for  
607 state-of-the-art genome-based taxonomy. *Nat. Commun.* 10(1):2182.
- 608 Mendes F, K., Livera A, P., Hahn M, W. 2019. The perils of intralocus recombination for  
609 inferences of molecular convergence. *Philos. Trans. R. Soc. B.* 374(1777):20180244.
- 610 Minh BQ, Schmidt HA, Chernomor O, Schrempf D, Woodhams MD, von Haeseler A, Lanfear  
611 R. 2020. IQ-TREE 2: new models and efficient methods for phylogenetic inference in  
612 the genomic era. *Mol. Biol. Evol.* 37(5):1530-1534.
- 613 Morgan CC, Creevey CJ, O'Connell MJ. 2014. Mitochondrial data are not suitable for  
614 resolving placental mammal phylogeny. *Mamm. Genome.* 25(11):636-647.
- 615 Nadan S, Walter JE, Grabow WOK, Mitchell DK, Taylor MB. 2003. Molecular characterization  
616 of astroviruses by reverse transcriptase PCR and sequence analysis: comparison of  
617 clinical and environmental isolates from South Africa. *Appl. Environ. Microb.*  
618 69(2):747.
- 619 Naser-Khdour S, Minh BQ, Zhang W, Stone EA, Lanfear R. 2019. The prevalence and impact  
620 of model violations in phylogenetic analysis. *Genome Biol. Evol.* 11(12):3341-3352.
- 621 Ogura Y, Ooka T, Iguchi A, Toh H, Asadulghani M, Oshima K, Kodama T, Abe H, Nakayama K,  
622 Kurokawa K et al. . 2009. Comparative genomics reveal the mechanism of the  
623 parallel evolution of O157 and non-O157 enterohemorrhagic *Escherichia coli*. *Proc.*  
624 *Natl. Acad. Sci. U.S.A.* 106(42):17939.
- 625 Paradis E, Claude J, Strimmer K. 2004. APE: analyses of phylogenetics and evolution in R  
626 language. *Bioinformatics* 20(2):289-290.
- 627 Pearce SL, Clarke DF, East PD, Elfekih S, Gordon KHJ, Jermiin LS, McGaughan A, Oakeshott  
628 JG, Papanikolaou A, Perera OP et al. . 2017. Genomic innovations, transcriptional  
629 plasticity and gene loss underlying the evolution and divergence of two highly  
630 polyphagous and invasive *Helicoverpa* pest species. *BMC Biol.* 15(1):63.
- 631 Penny D, Hendy MD, Steel MA. 1992. Progress with methods for constructing evolutionary  
632 trees. *Trends Ecol. Evol.* 7(3):73-79.
- 633 Pinho C, Harris DJ, Ferrand N. 2008. Non-equilibrium estimates of gene flow inferred from  
634 nuclear genealogies suggest that Iberian and North African wall lizards (*Podarcis*  
635 spp.) are an assemblage of incipient species. *BMC Evol. Biol.* 8(1):63.
- 636 Pitra C, Lieckfeldt D, Frahnert S, Fickel J. 2002. Phylogenetic relationships and ancestral  
637 areas of the bustards (Gruiformes: Otidae), inferred from mitochondrial DNA and  
638 nuclear intron sequences. *Mol. Phylogenet. Evol.* 23(1):63-74.
- 639 Posada D, Crandall KA. 2002. The effect of recombination on the accuracy of phylogeny  
640 estimation. *J. Mol. Evol.* 54(3):396-402.

- 641 R Core Team. 2020. R: A Language and Environment for Statistical Computing. Vienna,  
642 Austria: R Foundation for Statistical Computing.
- 643 Revell LJ. 2012. phytools: An R package for phylogenetic comparative biology (and other  
644 things). *Methods Ecol. Evol.* 3:217-223.
- 645 Salemi M, Desmyter J, Vandamme AM. 2000. Tempo and mode of human and simian T-  
646 lymphotropic virus (HTLV/STLV) evolution revealed by analyses of full-genome  
647 sequences. *Mol. Biol. Evol.* 17(3):374-386.
- 648 Salzburger W, Martens J, Sturmbauer C. 2002. Paraphyly of the Blue Tit (*Parus caeruleus*)  
649 suggested from cytochrome b sequences. *Mol. Phylogenet. Evol.* 24(1):19-25.
- 650 Schliep KP. 2011. phangorn: phylogenetic analysis in R. *Bioinformatics* 27(4):592-592.
- 651 Scornavacca C, Galtier N. 2017. Incomplete lineage sorting in mammalian phylogenomics.  
652 *Syst. Biol.* 66(1):112-120.
- 653 Shi CM, Yang Z. 2018. Coalescent-based analyses of genomic sequence data provide a  
654 robust resolution of phylogenetic relationships among major groups of gibbons. *Mol.*  
655 *Biol. Evol.* 35(1):159-179.
- 656 Shi W, Freitas IT, Zhu C, Zheng W, Hall WW, Higgins DG. 2012. Recombination in hepatitis C  
657 virus: identification of four novel naturally occurring inter-subtype recombinants.  
658 *PloS one* 7(7):e41997-e41997.
- 659 Short DPG, O'Donnell K, Geiser DM. 2014. Clonality, recombination, and hybridization in the  
660 plumbing-inhabiting human pathogen *Fusarium keratoplasticum* inferred from  
661 multilocus sequence typing. *BMC Evolutionary Biology* 14(1):91.
- 662 Song H, Sheffield NC, Cameron SL, Miller KB, Whiting MF. 2010. When phylogenetic  
663 assumptions are violated: base compositional heterogeneity and among-site rate  
664 variation in beetle mitochondrial phylogenomics. *Syst. Entomol.* 35(3):429-448.
- 665 Stadler T. 2017. TreeSim: simulating phylogenetic trees. R package version 2.4.  
666 <http://CRAN.R-project.org/package=TreeSim>
- 667 Stanborough T, Fegan N, Powell SM, Singh T, Tamplin M, Chandry PS. 2018. Genomic and  
668 metabolic characterization of spoilage-associated *Pseudomonas* species. *Int. J. Food*  
669 *Microbiol.* 268:61-72.
- 670 Steiner G, Dreyer H. 2003. Molecular phylogeny of Scaphopoda (Mollusca) inferred from 18S  
671 rDNA sequences: support for a Scaphopoda–Cephalopoda clade. *Zool. Scr.* 32(4):343-  
672 356.
- 673 Strimmer K, von Haeseler A. 1997. Likelihood-mapping: a simple method to visualize  
674 phylogenetic content of a sequence alignment. *Proc. Natl. Acad. Sci. U.S.A.*  
675 94(13):6815-6819.
- 676 Tay WT, Walsh TK, Downes S, Anderson C, Jermiin LS, Wong TKF, Piper MC, Chang ES,  
677 Macedo IB, Czapak C et al. . 2017. Mitochondrial DNA and trade data support  
678 multiple origins of *Helicoverpa armigera* (Lepidoptera, Noctuidae) in Brazil. *Sci. Rep.*  
679 7:45302.
- 680 Tian CF, Zhou YJ, Zhang YM, Li QQ, Zhang YZ, Li DF, Wang S, Wang J, Gilbert LB, Li YR et al. .  
681 2012. Comparative genomics of rhizobia nodulating soybean suggests extensive  
682 recruitment of lineage-specific genes in adaptations. *Proc. Natl. Acad. Sci. U.S.A.*  
683 109(22):8629.
- 684 Verbruggen H, Theriot EC. 2008. Building trees of algae: some advances in phylogenetic and  
685 evolutionary analysis. *Eur. J. Phycol.* 43(3):229-252.
- 686 Weinert LA, Werren JH, Aebi A, Stone GN, Jiggins FM. 2009. Evolution and diversity of  
687 *Rickettsia* bacteria. *BMC Biol.* 7(1):6.

- 688 Weisrock DW, Smith SD, Chan LM, Biebouw K, Kappeler PM, Yoder AD. 2012. Concatenation  
689 and concordance in the reconstruction of mouse lemur phylogeny: an empirical  
690 demonstration of the effect of allele sampling in phylogenetics. *Mol. Biol. Evol.*  
691 29(6):1615-1630.
- 692 White DJ, Bryant D, Gemmell NJ. 2013. How good are indirect tests at detecting  
693 recombination in human mtDNA? *G3 (Bethesda)* 3(7):1095-1104.
- 694 White DJ, Gemmell NJ. 2009. Can indirect tests detect a known recombination event in  
695 human mtDNA? *Mol. Biol. Evol.* 26(7):1435-1439.
- 696 Wickham H. 2016. ggplot2: Elegant Graphics for Data Analysis. New York: Springer-Verlag.
- 697 Wickham H. 2019. stringr: Simple, Consistent Wrappers for Common String Operations. R  
698 package version 1.4.0. <https://CRAN.R-project.org/package=stringr>.
- 699 Wielstra B, Arntzen JW, van der Gaag KJ, Pabijan M, Babik W. 2014. Data concatenation,  
700 Bayesian concordance and coalescent-based analyses of the species tree for the  
701 rapid radiation of *Triturus* newts. *PLOS ONE* 9(10):e111011.
- 702 Wiens JJ. 1998. Combining data sets with different phylogenetic histories. *Syst. Biol.*  
703 47(4):568-581.
- 704 Wu M, Kostyun JL, Hahn MW, Moyle LC. 2018. Dissecting the basis of novel trait evolution in  
705 a radiation with widespread phylogenetic discordance. *Mol. Ecol.* 27(16):3301-3316.
- 706 Xu L, Chen H, Hu X, Zhang R, Zhang Z, Luo ZW. 2006. Average gene length is highly  
707 conserved in prokaryotes and eukaryotes and diverges only between the two  
708 kingdoms. *Mol. Biol. Evol.* 23(6):1107-1108.
- 709 Zhao L, Li X, Zhang N, Zhang S-D, Yi T-S, Ma H, Guo Z-H, Li D-Z. 2016. Phylogenomic analyses  
710 of large-scale nuclear genes provide new insights into the evolutionary relationships  
711 within the rosids. *Mol. Phylogenet. Evol.* 105:166-176.
- 712
